# Supplementary material for: Significant Enhancement of the Visible Light Photocatalytic Properties in 3D BiFeO3/Graphene Composites
Source: MDPI journal article supplement (doi:10.3390/nano9010065), 2019-01-05
Supplement: s1 [file s1]

# Supporting Information Significant Enhancement of the Visible Light Photocatalytic Properties in 3D BiFeO<sub>3</sub>/Graphene Composites

Jiquan Li <sup>1</sup>, Youyan Wang <sup>1</sup>, Huan Ling <sup>1</sup>, Ye Qiu <sup>1</sup>, Jia Lou <sup>2</sup>, Xu Hou <sup>3</sup>, Sankar Parsad Bag <sup>3</sup>,

Jie Wang <sup>3</sup>, Huaping Wu <sup>1,\*</sup> and Guozhong Chai <sup>1,\*</sup>

<sup>1</sup> Key Laboratory of E&M, Zhejiang University of Technology, Ministry of Education & Zhejiang Province, Hangzhou 310014, China; lijq@zjut.edu.cn (J.L.); m15958026031@163.com (Y.W.); ldorothyh07@163.com (H.L.); qiuye2024@163.com (Y.Q.);

<sup>2</sup> Piezoelectric Device Laboratory, Department of Mechanics and Engineering Science, Ningbo University, Ningbo, Zhejiang 315211, China; jiajia\_smile@163.com (J.L.)

<sup>3</sup> Department of Engineering Mechanics, School of Aeronautics and Astronautics, Zhejiang University, Hangzhou 310027, China; emhouxu@zju.edu.cn; sankar.bag19@gmail.com; jw@zju.edu.cn (J.W.)

\* Correspondence: wuhuaping@gmail.com, chaigz@zjut.edu.cn; Tel.: +86-15158867224 (H.W.)

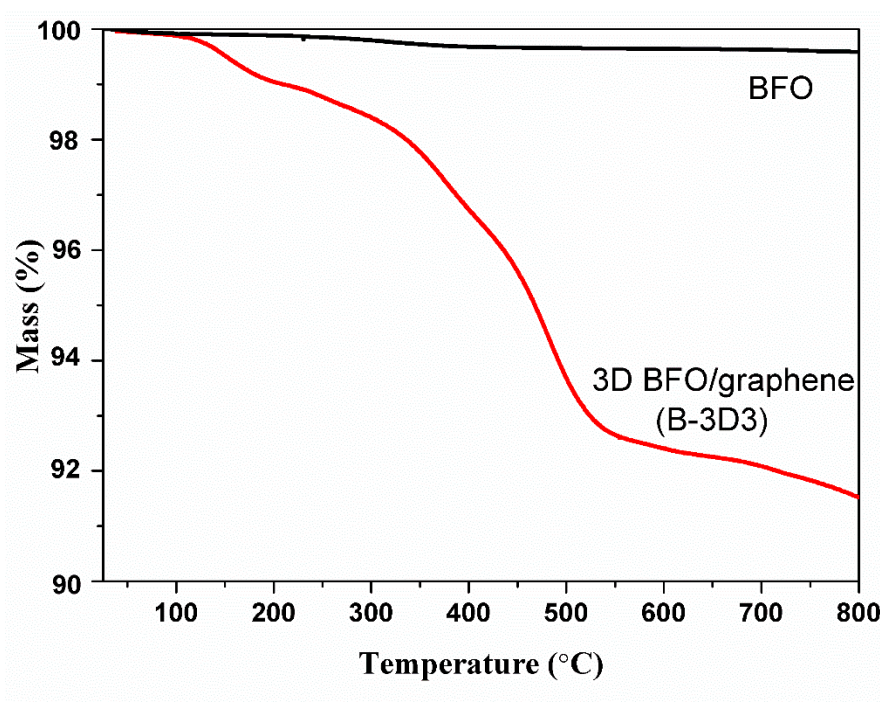

**Figure S1.** TGA of BFO and 3D BFO/graphene composite.

As shown in Figure S1, there is a 0.5% weight loss in the BFO sample, which may be caused by moisture or organic impurities in the sample. The greater weight loss in the BFO/graphene composite is due to the degradation of rGO. Therefore, we speculate that the mass fraction of rGO in the composite is approximately 8.0%.
